# Supplementary material for: Tissue immune profiles supporting response to mesenchymal stromal cell therapy in acute graft-versus-host disease—a gut feeling
Source: PubMed Central journal article supplement (PMC6864966; doi:10.1186/s13287-019-1449-9), 2019-11-20

*CD4*

| CD4        | ir       | Std. Err. | z      | P> z  | [95% Conf. Interval] |          |
|------------|----------|-----------|--------|-------|----------------------|----------|
| CD4 group  |          |           |        |       |                      |          |
| Responders | .4805206 | .0078048  | -45.12 | 0.000 | .4654644             | .4960638 |
| _cons      | 1459.875 | 13.50868  | 787.41 | 0.000 | 1433.637             | 1486.593 |

Adjusted predictions                                                 Number of obs     =     16  
Model VCE     : OIM

Expression     : Predicted incidence rate, predict(ir)

|                |  | Margin          | Delta-method<br>Std. Err. | z      | P> z  | [95% Conf. Interval] |          |
|----------------|--|-----------------|---------------------------|--------|-------|----------------------|----------|
| group          |  |                 |                           |        |       |                      |          |
| Non-Responders |  | <b>1459.875</b> | 13.50868                  | 108.07 | 0.000 | 1433.398             | 1486.352 |
| Responders     |  | <b>701.5</b>    | 9.364161                  | 74.91  | 0.000 | 683.1466             | 719.8534 |

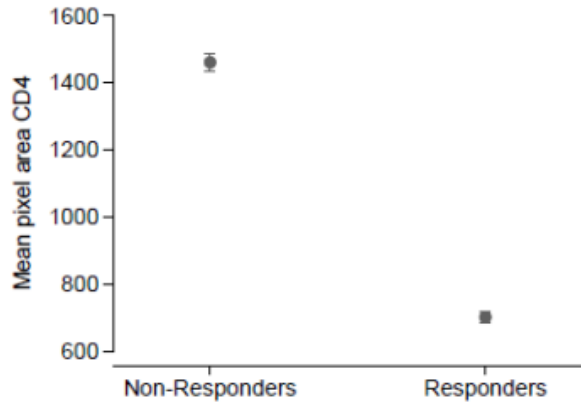

*FOXP3*

| FOXP3       | ir       | Std. Err. | z      | P> z  | [95% Conf. Interval] |          |
|-------------|----------|-----------|--------|-------|----------------------|----------|
| FOXP3 group |          |           |        |       |                      |          |
| Responders  | 1.381538 | .0175151  | 25.49  | 0.000 | 1.347633             | 1.416297 |
| _cons       | 1340.625 | 12.9452   | 745.74 | 0.000 | 1315.491             | 1366.239 |

Adjusted predictions                                                 Number of obs     =     16  
Model VCE     : OIM

Expression     : Predicted incidence rate, predict(ir)

|                |  | Margin          | Delta-method<br>Std. Err. | z      | P> z  | [95% Conf. Interval] |          |
|----------------|--|-----------------|---------------------------|--------|-------|----------------------|----------|
| group          |  |                 |                           |        |       |                      |          |
| Non-Responders |  | <b>1340.625</b> | 12.9452                   | 103.56 | 0.000 | 1315.253             | 1365.997 |
| Responders     |  | <b>1852.125</b> | 15.21564                  | 121.73 | 0.000 | 1822.303             | 1881.947 |

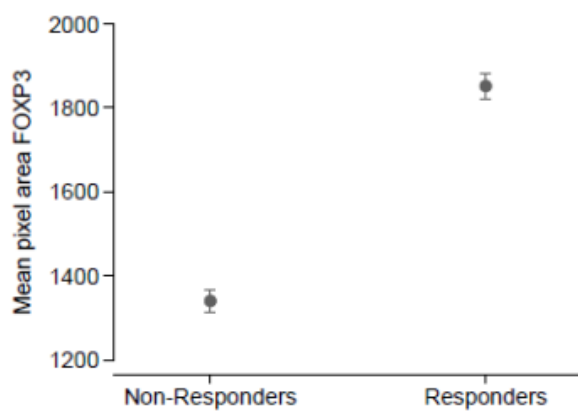

### CD56

| CD56       | ir       | Std. Err. | z       | P> z  | [95% Conf. Interval] |          |
|------------|----------|-----------|---------|-------|----------------------|----------|
| CD56       |          |           |         |       |                      |          |
| group      |          |           |         |       |                      |          |
| Responders | .5969061 | .0020127  | -153.03 | 0.000 | .5929743             | .600864  |
| _cons      | 29413.13 | 60.63531  | 4991.11 | 0.000 | 29294.52             | 29532.21 |

Adjusted predictions                                              Number of obs     =     16  
Model VCE       : OIM

Expression     : Predicted incidence rate, predict(ir)

|                | Margin          | Delta-method<br>Std. Err. | z      | P> z  | [95% Conf. Interval] |             |
|----------------|-----------------|---------------------------|--------|-------|----------------------|-------------|
| group          |                 |                           |        |       |                      |             |
| Non-Responders | <b>29413.13</b> | 60.63531                  | 485.08 | 0.000 | 29294.28             | 29531.97    |
| Responders     | <b>17556.88</b> | 46.84666                  | 374.77 | 0.000 | 17465.06             | 17648.69 a. |

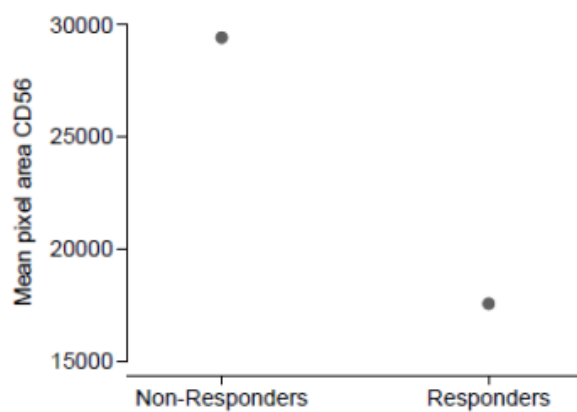



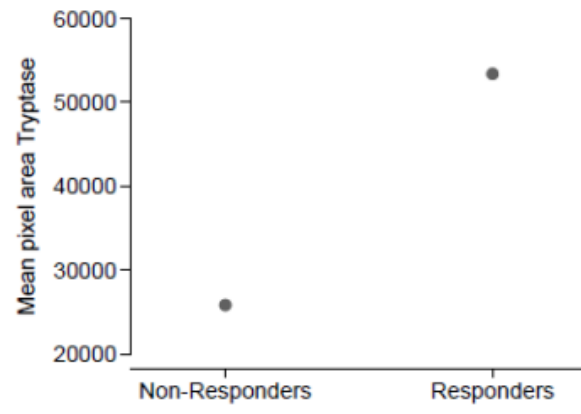

Supplement: 13287_2019_1449_MOESM1_ESM.pdf [file 13287_2019_1449_MOESM1_ESM.pdf]
